# Supplementary material for: BNT162b2 mRNA Vaccination Leads to Long-Term Protection from COVID-19 Disease
Source: MDPI journal article supplement (doi:10.3390/vaccines9101164), 2021-10-12
Supplement: s1 [file s1]

## Supplementary Material

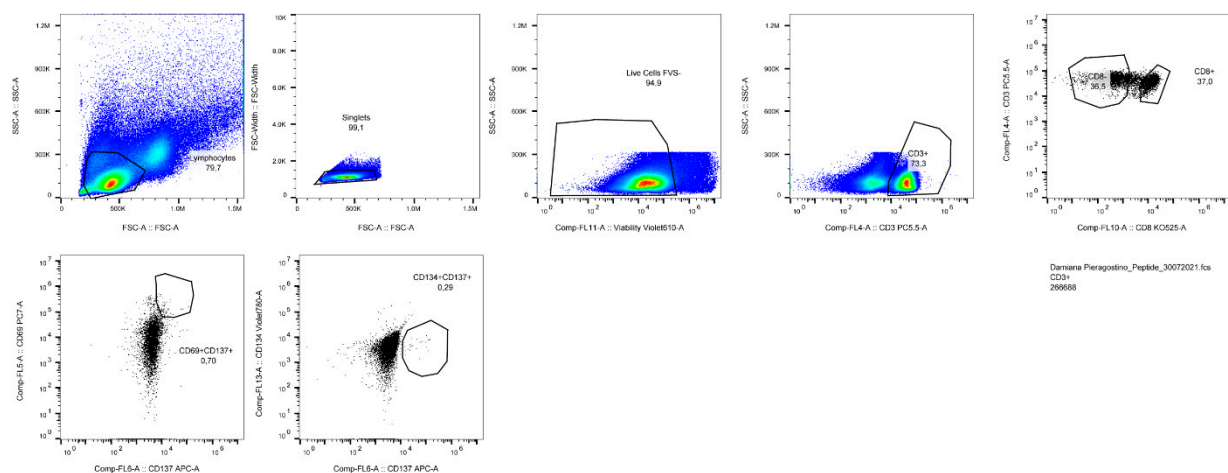

**Figure S1. Gating strategy for SARS-CoV-2 S-reactive T cell identification.** Lymphocytes were first selected in a forward scatter (FSC) area versus side scatter (SSCA) area dot-plot. Aggregates were next excluded (FSC-A/FSC-width [W] plot) and live cells were identified. CD3+ T-cells were then gated (CD3/SSCA dot-plot). T-cells were split into CD8- (CD4+ cells) and CD8+ subtypes (CD8/CD3). TCR-dependent activation induced markers (AIM) from a representative donor are also represented for CD8+ T cells (CD137/CD69 dot-plot) and CD4+ T cells (CD137/CD134 dot-plot).

**Table S1: Clinical Details of enrolled patients**

| Subjects   |  | Number of subjects for IgG | Number of Subjects for Memory |  | Follow up | Age of IgG levels | Age of Follow-Up subjects |
|------------|--|----------------------------|-------------------------------|--|-----------|-------------------|---------------------------|
| <b>CTR</b> |  | 20                         | 15                            |  |           | 45,95 ± 19,13     |                           |
| <b>T1</b>  |  | 40                         | 15                            |  | 5         | 36,57 ± 10,32     | 42,2 ± 5,54               |
| <b>T2</b>  |  | 40                         | 12                            |  | 5         | 36,57 ± 10,32     | 42,2 ± 5,54               |

**Table S2: Reagent List for Flow Cytometry Analyses**

| Specificity | Clone  | Fluorochrome | Amount <i>per test</i> | Type staining | Catalogue Number |
|-------------|--------|--------------|------------------------|---------------|------------------|
| CD197       | 2-L1-A | PE           | 5 µl                   | Surface       | 566742           |
| CD3         | SK7    | PerCP-Cy5.5  | 20 µl                  | Surface       | 332771           |
| CD69        | FN50   | PE-Cy7       | 5 µl                   | Surface       | 561928           |
| CD45RA      | HI100  | APC-H7       | 5 µl                   | Surface       | 560674           |
| CD8         | SK1    | V500-C       | 5 µl                   | Surface       | 647457           |

|             |          |                    |       |               |        |
|-------------|----------|--------------------|-------|---------------|--------|
| FVS<br>575V | -        | -                  | 1 µl  | Surface       | 565694 |
| CD134       | L106     | BV768              | 5 µl  | Intracellular | 744746 |
| CD137       | 4B4-1    | APC                | 20 µl | Intracellular | 550890 |
| IFNγ        | B27      | FITC               | 20 µl | Intracellular | 552887 |
| TNFα        | MAB11    | Alexa<br>Fluor™700 | 5 µl  | Intracellular | 557996 |
| IL-2        | 5344.111 | BV711              | 5 µl  | Intracellular | 563946 |

R-phycoerythrin (PE); peridinin chlorophyll protein-cyanine 5.5 (PerCP-Cy 5.5); PE-Cyanine 7 (Cy7); Allophycocyanin-Hilite®7 (APC-H7); Fixable Viability Stain (FVS); Brilliant Violet (BV); Allophycocyanin (APC); Fluorescein isothiocyanate (FITC). All the reagents listed in the table are from BD Biosciences.

**Figure S2:** Spike specific cytokine production within (T1) and after (T2) two months from the second dose BNT162b2 administration. Cytokines (interferon [IFN]- $\gamma$ , CD40L, tumour necrosis factor [TNF]- $\alpha$  and interleukin [IL]-2) were individually analysed for each subset (CD4+ and CD8+), in a representative BNT162b2 vaccinated donor at two different time points after the second dose administration, using the corresponding DMSO control to assess and subtract the background.

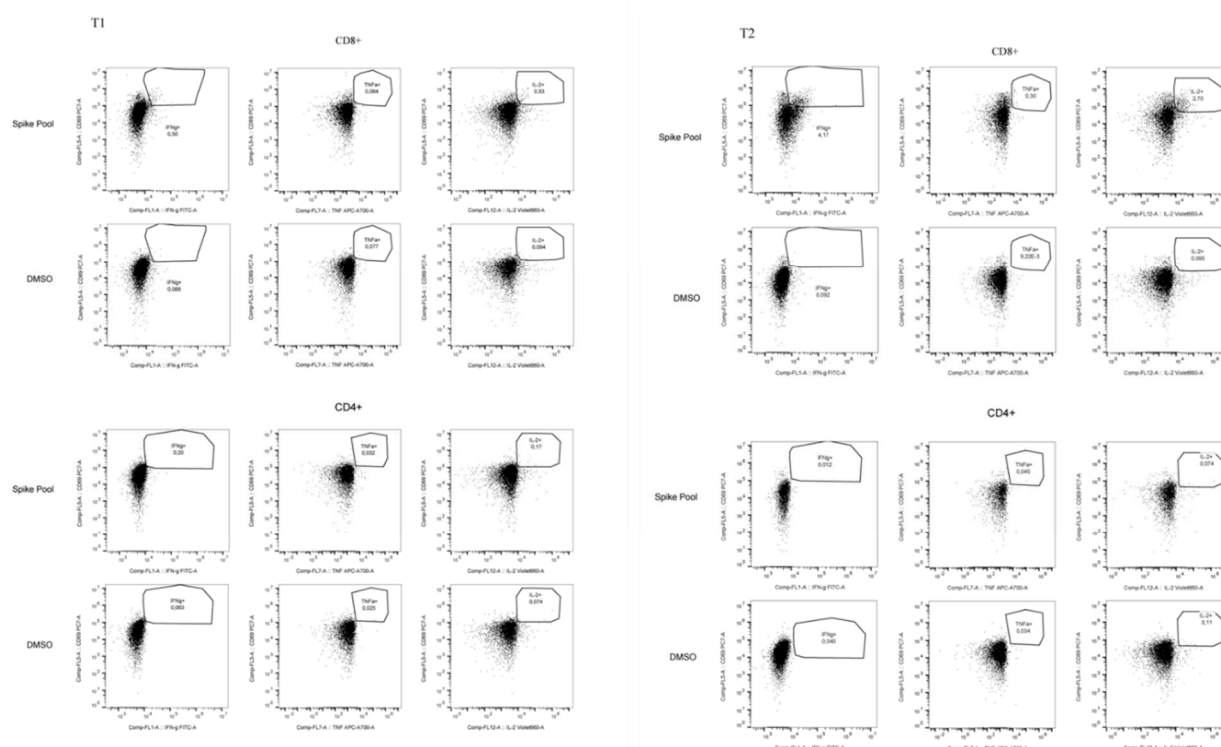

**Figure S3:** CD4+ memory T-cell frequencies analysed at two different time points: within (T1) and after (T2) two months from the second dose BNT162b2 administration.

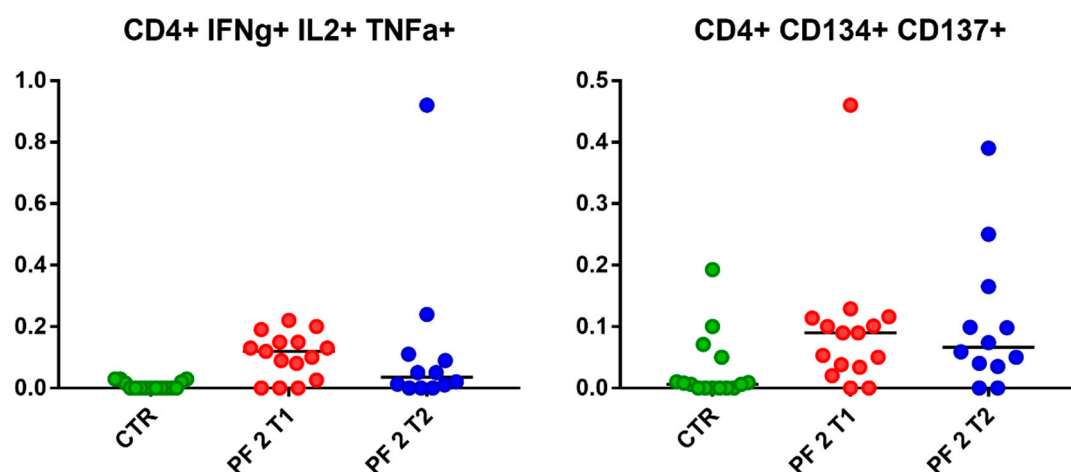

**Table S3** Mean of measured biomarkers

| Table S3 | Levels of IgG       | Age of Memory subjects | Frequencies CD8+IFNγ+ IL2+ TNFα+ | Frequencies CD8+CD137+CD69+ | Frequencies CD8+IFNγ+ IL2+ TNFα+ Follow-Up subjects | Frequencies CD8+CD137+CD69+ |
|----------|---------------------|------------------------|----------------------------------|-----------------------------|-----------------------------------------------------|-----------------------------|
| CTR      | 0,2185 ± 0,0631     | 46,07 ± 11,73          | 0,224 ± 0,384                    | 0,038294 ± 0,071532         |                                                     |                             |
| VACC T1  | 66,23375 ± 22,10569 | 44,13 ± 9,3            | 0,3497 ± 0,373                   | 0,0636 ± 0,07877            | 0,5132 ± 0,5540                                     | 0,1054 ± 0,1044             |
| VACC T2  | 8,819 ± 6,58186     | 40,75 ± 6,94           | 1,47625 ± 1,5757                 | 0,38883 ± 0,41877           | 2,2816 ± 2,0848                                     | 0,552 ± 0,4663              |

**Table S4:** Correlation analysis between age of the subjects and their immunological responses in terms of antibody levels and CD8+ cells frequencies

|                         | Age vs.              | Age vs.           | Age vs.                   |
|-------------------------|----------------------|-------------------|---------------------------|
|                         | CD8+IFNγ+ IL2+ TNFα+ | CD8+CD137+CD69+   | IgG at time of collection |
| 95% confidence interval | -0,4763 to 0,195     | -0,5475 to 0,1006 | -0,3996 to 0,3325         |
| R squared               | 0,02526              | 0,06321           | 0,001502                  |
| P value                 |                      |                   |                           |
| P (two-tailed)          | 0,3770               | 0,1581            | 0,8418                    |
| P value summary         | ns                   | ns                | ns                        |
